RESEARCH ARTICLE

# Urinary iodine concentration (UIC) could be a promising biomarker for predicting goiter among school-age children: A systematic review and meta-analysis

Linlin Xiu, Gansheng Zhong\*, Xueman Ma

School of Basic Medical Science, Beijing University of Chinese Medicine, Beijing, China

\* [zhonggansheng@126.com](mailto:zhonggansheng@126.com)

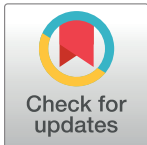

## Abstract

### Objectives

To evaluate whether urinary iodine concentration (UIC) can predict goiter among school-age children, and to assess the association between UIC and goiter prevalence.

### Methods

We searched the MEDLINE, EMBASE, Cochrane Library (Cochrane Database of Systematic Reviews), Web of Science, CNKI, VIP, and Wan Fang databases for relevant reports in both English and Chinese up to August 25, 2016. The mean differences (MD) and 95% confidence intervals (CI) were calculated for the UIC and goiter prevalence assessments. Pooled odds ratios and 95% CIs were used to compare the prevalences of goiter in the different UIC groups.

### Results

We identified 11 case-control studies, and found that children with goiter had lower UIC values, compared to children without goiter (MD:  $-1.82$ , 95% CI:  $-3.24, -0.40$ ,  $p < 0.05$ ). An increased risk of goiter was associated with UIC values of  $< 20 \mu\text{g/L}$  or  $> 200 \mu\text{g/L}$ .

### Conclusion

The results of our meta-analysis suggest that lower UIC values were associated with an increased risk of goiter, and that iodine deficiency may lead to an increased risk of goiter. Furthermore, we observed U-shaped relationships between UIC and the prevalence of goiter, which suggests that both severe iodine deficiency and excessive iodine intake may lead to increased risks of goiter.

## OPEN ACCESS

**Citation:** Xiu L, Zhong G, Ma X (2017) Urinary iodine concentration (UIC) could be a promising biomarker for predicting goiter among school-age children: A systematic review and meta-analysis. PLoS ONE 12(3): e0174095. <https://doi.org/10.1371/journal.pone.0174095>

**Editor:** Stephen L. Clarke, Oklahoma State University, UNITED STATES

**Received:** November 1, 2016

**Accepted:** March 4, 2017

**Published:** March 22, 2017

**Copyright:** © 2017 Xiu et al. This is an open access article distributed under the terms of the [Creative Commons Attribution License](https://creativecommons.org/licenses/by/4.0/), which permits unrestricted use, distribution, and reproduction in any medium, provided the original author and source are credited.

**Data Availability Statement:** All relevant data are within the paper and its Supporting Information files.

**Funding:** The author(s) received no specific funding for this work.

**Competing interests:** The authors have declared that no competing interests exist.

## Introduction

Goiter remains an important public health concern, especially in developing countries [1–3]. During recent decades, goiter was mainly considered the result of inadequate iodine intake, although excessive iodine intake can also cause goiter, especially in areas with high iodine levels, such as coastal areas, areas with high iodine levels in the drinking water, and areas with poor iodine monitoring [4–6]. Thus, both inadequate and excessive iodine intakes are considered risk factors for goiter [7–10].

The measurement of urinary iodine concentration (UIC) in casual urine specimens is recommended for monitoring iodine status [1]. In addition, UIC is highly sensitive to recent changes in iodine intake, as up to 90% of iodine is absorbed and excreted in the urine [11]. Although iodine intake is a primary determinant of goiter formation [1], measuring UIC does not directly assess thyroid function and size. Nevertheless, excessively high or low UIC values in a population predict a high risk of goiter formation. The World Health Organization (WHO)'s classifications of iodine nutrition status are based on UIC values of <20 µg/L (severe iodine deficiency), 20–49 µg/L (moderate iodine deficiency), 50–99 µg/L (mild iodine deficiency), 100–199 µg/L (adequate iodine intake), 200–299 µg/L (more than adequate iodine intake), and >300 µg/L (excessive iodine intake). UIC levels of >300 µg/L are also associated with risks of iodine-induced goiter, hyperthyroidism, and hypothyroidism. School-age children (6–18 years old) are generally considered appropriate for assessing population-level iodine status, because they are readily accessible and susceptible to both iodine deficiency and excess [1].

As goiter formation reflects chronic iodine deficiency or excess, it can be used as a baseline assessment of a region's iodine status [12], and goiter formation can be predicted and prevented by ensuring that the population has an appropriate and sustainable intake of iodine. In this context, UIC measurements are often used to evaluate the iodine nutritional status of a population [1], and can be used to track iodine status changes over time. Furthermore, spot urine specimens are easy to obtain, and urinary iodine assays are simple to understand and use. Thus, modern methods have made it feasible to process large numbers of samples at a low cost and to characterize the population-level distribution according to different cut-off points and intervals. Therefore, UIC is a convenient, inexpensive, and promising biomarker for predicting and preventing goiter in areas where goiter is endemic and long-term monitoring is warranted.

The present meta-analysis aimed to evaluate the evidence regarding whether UIC could predict goiter among school-age children, and to assess the goiter prevalences in different UIC groups.

## Methods

### Search protocol

The present meta-analysis was performed according to the PRISMA guidelines [13] and the Meta-analysis of Observational Studies in Epidemiology guidelines [14]. This meta-analysis was also registered in the PROSPERO registry (CRD42016043222). The systematic literature search was performed using the PubMed, EMBASE, Cochrane Library, Web of Science, Chinese Science and Technology Journal Database, China National Knowledge Infrastructure, and Wanfang databases to identify relevant reports in English and Chinese up to August 25, 2016. All databases were searched using the following key words urinary iodine, goiter and children. The detailed search strategy for PubMed was: (goiter [Title/Abstract] AND urinary iodine [Title/Abstract]) AND children [Title/Abstract] AND "humans" [MeSH Terms]. The

reference lists of the returned articles were manually examined to identify any additional relevant studies.

### Selection criteria

The inclusion criteria were studies that: (a) assessed and reported UIC among school-age children with and without goiter, (b) compared the prevalences of goiter in different UIC groups based on the WHO categories, (c) used a case-control or cohort design, and (d) evaluated school-age children (6–18 years old). We excluded studies that did not fulfill the inclusion criteria, and also excluded conference abstracts and animal experimental studies.

### Data extraction

The following data were extracted from the included studies: (a) first author, (b) publication and study year, (c) study location, (d) study design, (e) sample size and number of goiter cases, (f) UIC values from children with and without goiter, and (g) the prevalences of goiter in the different UIC groups (<20 µg/L vs. >20 µg/L, <50 µg/L vs. >50 µg/L, <100 µg/L vs. >100 µg/L, <200 µg/L vs. >200 µg/L, and <300 µg/L vs. >300 µg/L). The extracted data were entered into an Excel file and Review Manager software by two of the authors.

### Study quality assessment

The quality of the included studies was assessed using the Newcastle-Ottawa Scale [15].

### Statistical analysis

Meta-analyses were used to provide overall estimates of UIC among children with and without goiter, and to compare the prevalences of goiter in the different UIC groups. The mean differences (MD) and 95% confidence intervals (CI) were calculated for the UIC and goiter prevalence data. The assumption of heterogeneity was assessed, and heterogeneity was considered present at a p-value of <0.1. To compare the prevalences of goiter in the different UIC groups, we calculated the pooled odds ratios (ORs) and 95% CIs. All analyses were performed using Review Manager software (version 5.3), and differences were considered statistically significant at p-values of <0.05.

## Results

### The included studies

Our literature search identified 560 potentially relevant reports that were published up to August 25, 2016, and we also identified five other studies from the reports' reference lists. However, we excluded 116 reports because of duplication, 316 reports because they were unrelated to the aim of this meta-analysis, and 122 reports for failing to fulfill the inclusion criteria after a review of the full text (primarily because they failed to compare UIC values between children with and without goiter). A total of 11 studies fulfilled our inclusion criteria and were included in the meta-analysis [16–26]. The selection process and outcomes are shown in Fig 1.

The basic characteristics of the 11 included studies are shown in Table 1. The studies were performed in Iran (n = 4), Turkey (n = 4), India (n = 1), and China (n = 1). All of the studies were cross-sectional case-control studies, and the numbers of participants ranged from 250 to 52,087. The study-specific quality assessment scores for the 11 studies are summarized in Table 1, and we defined high-quality studies as having quality scores of  $\geq 6$  (S2 Table).

Eight studies [16–22, 26] reported information regarding UIC in children with and without goiter, and five studies [17, 23–26] investigated goiter prevalences according to iodine status.

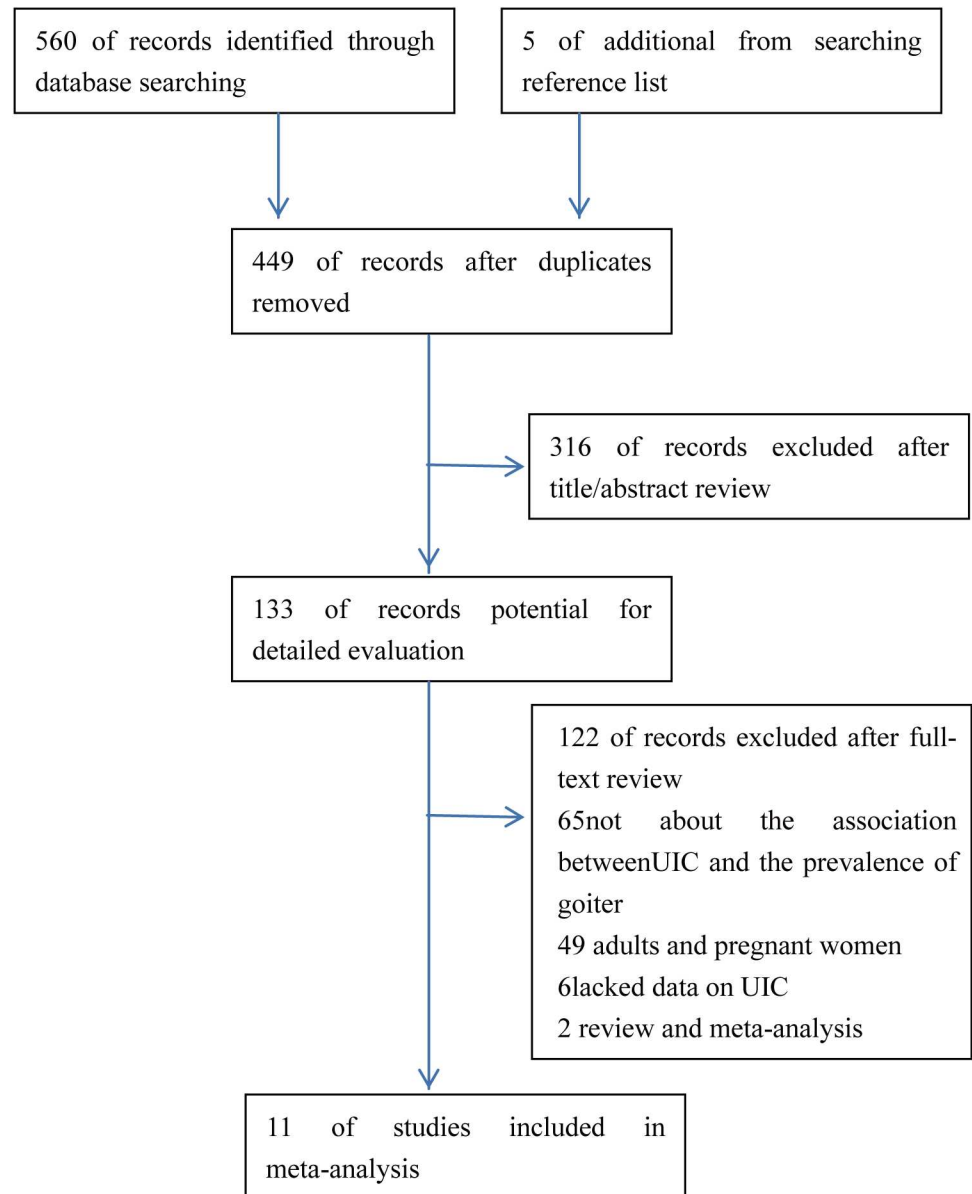

**Fig 1. Flow diagram of the study selection process.**

<https://doi.org/10.1371/journal.pone.0174095.g001>

## Heterogeneity

As shown in Fig 2, our heterogeneity test provided a p-value of <0.05 and an  $I^2$  value of 99%, which confirmed that significant heterogeneity was present. Possible explanations for the heterogeneity include the studies evaluating different races and ethnicities, the different sample sizes, differences in the laboratory tests for determining UIC, and the possible effects of regional economic and cultural differences.

## Meta-analysis

**Comparing UIC values from children with and without goiter.** The pooled results from the comparison of UIC between children with and without goiter are shown in Fig 2. A total of

Table 1. Characteristic of the included studies.

| Study (year)                 | Country | Study design | Sample size | Cases/controls | NOS score | Outcome assessment                                                                     |
|------------------------------|---------|--------------|-------------|----------------|-----------|----------------------------------------------------------------------------------------|
| Rezvanfar et al. [16] 2007   | Iran    | Case-control | 6,520       | 179/140        | 9         | UIC in children with and without goiter                                                |
| Sethy et al. [17] 2007       | India   | Case-control | 1,248       | 95/346         | 8         | UIC in children with and without goiter; goiter prevalences according to iodine status |
| Cetin et al. [18] 2006       | Turkey  | Case-control | 500         | 152/348        | 8         | UIC in children with and without goiter                                                |
| Cinaz et al. [19] 2004       | Turkey  | Case-control | 905         | 107/165        | 8         | UIC in children with and without goiter                                                |
| Dodd et al. [20] 1993        | India   | Case-control | 866         | 489/377        | 8         | UIC in children with and without goiter                                                |
| Özkan et al. [21] 2004       | Turkey  | Case-control | 250         | 119/131        | 8         | UIC in children with and without goiter                                                |
| Sanjari et al. [22] 2014     | Iran    | Case-control | 5,380       | 130/40         | 8         | UIC in children with and without goiter                                                |
| Liu et al. [23] 2010         | China   | Case-control | 52,087      |                | 8         | Goiter prevalences according to iodine status                                          |
| Azizi et al. [24] 2008       | Iran    | Case-control | 6,000       |                | 8         | Goiter prevalences according to iodine status                                          |
| Aminorroaya et al. [25] 2001 | Iran    | Case-control | 3,791       |                | 8         | Goiter prevalences according to iodine status                                          |
| Egri et al. [26] 2006        | Turkey  | Case-control | 9,412       | 152/416        | 7         | UIC in children with and without goiter; goiter prevalences according to iodine status |

<https://doi.org/10.1371/journal.pone.0174095.t001>

3,386 children were included in the analysis (1,423 cases with goiter and 1,963 cases without goiter). Children with goiter had significantly lower UIC values, compared to children without goiter (MD: -1.82; 95% CI: -3.24, -0.40;  $p < 0.05$ ), and significant heterogeneity was observed ( $I^2 = 99\%$ ;  $p < 0.05$ ).

**Association between iodine status and goiter prevalence.** Fig 3 shows the association between iodine status and goiter prevalence, based on the different UIC categories.

We observed a U-shaped association between the UIC values and the prevalence of goiter. The pooled results for these comparison revealed increasing risks of goiter at both high UIC values ( $>200 \mu\text{g/L}$ ) and low UIC values ( $<20 \mu\text{g/L}$ ):  $<20 \mu\text{g/L}$  vs.  $>20 \mu\text{g/L}$  (OR: 1.54, 95% CI: 1.01, 2.35;  $p = 0.04$ ),  $<50 \mu\text{g/L}$  vs.  $>50 \mu\text{g/L}$  (OR: 0.99, 95% CI: 0.75, 1.31;  $p = 0.96$ ),  $<100 \mu\text{g/L}$  vs.  $>100 \mu\text{g/L}$  (OR: 0.90, 95% CI: 0.68, 1.18;  $p = 0.45$ ),  $<200 \mu\text{g/L}$  vs.  $>200 \mu\text{g/L}$  (OR: 0.79,

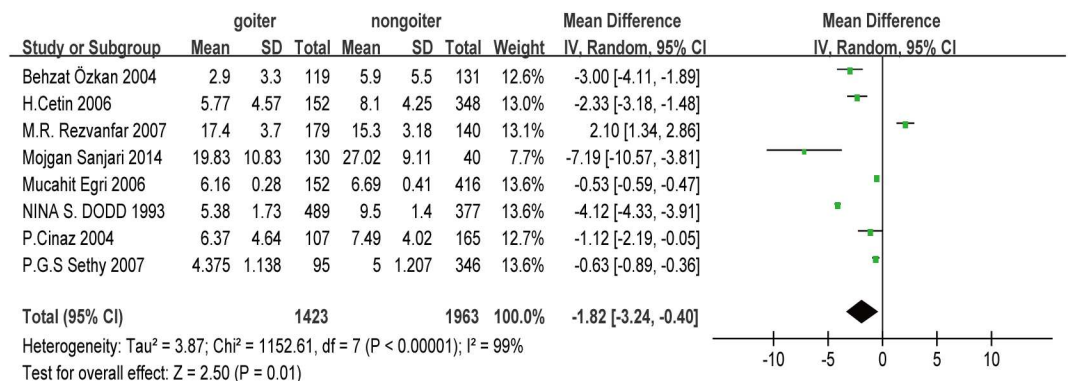

Fig 2. Forest plot showing the comparison of UIC between children with and without goiter.

<https://doi.org/10.1371/journal.pone.0174095.g002>

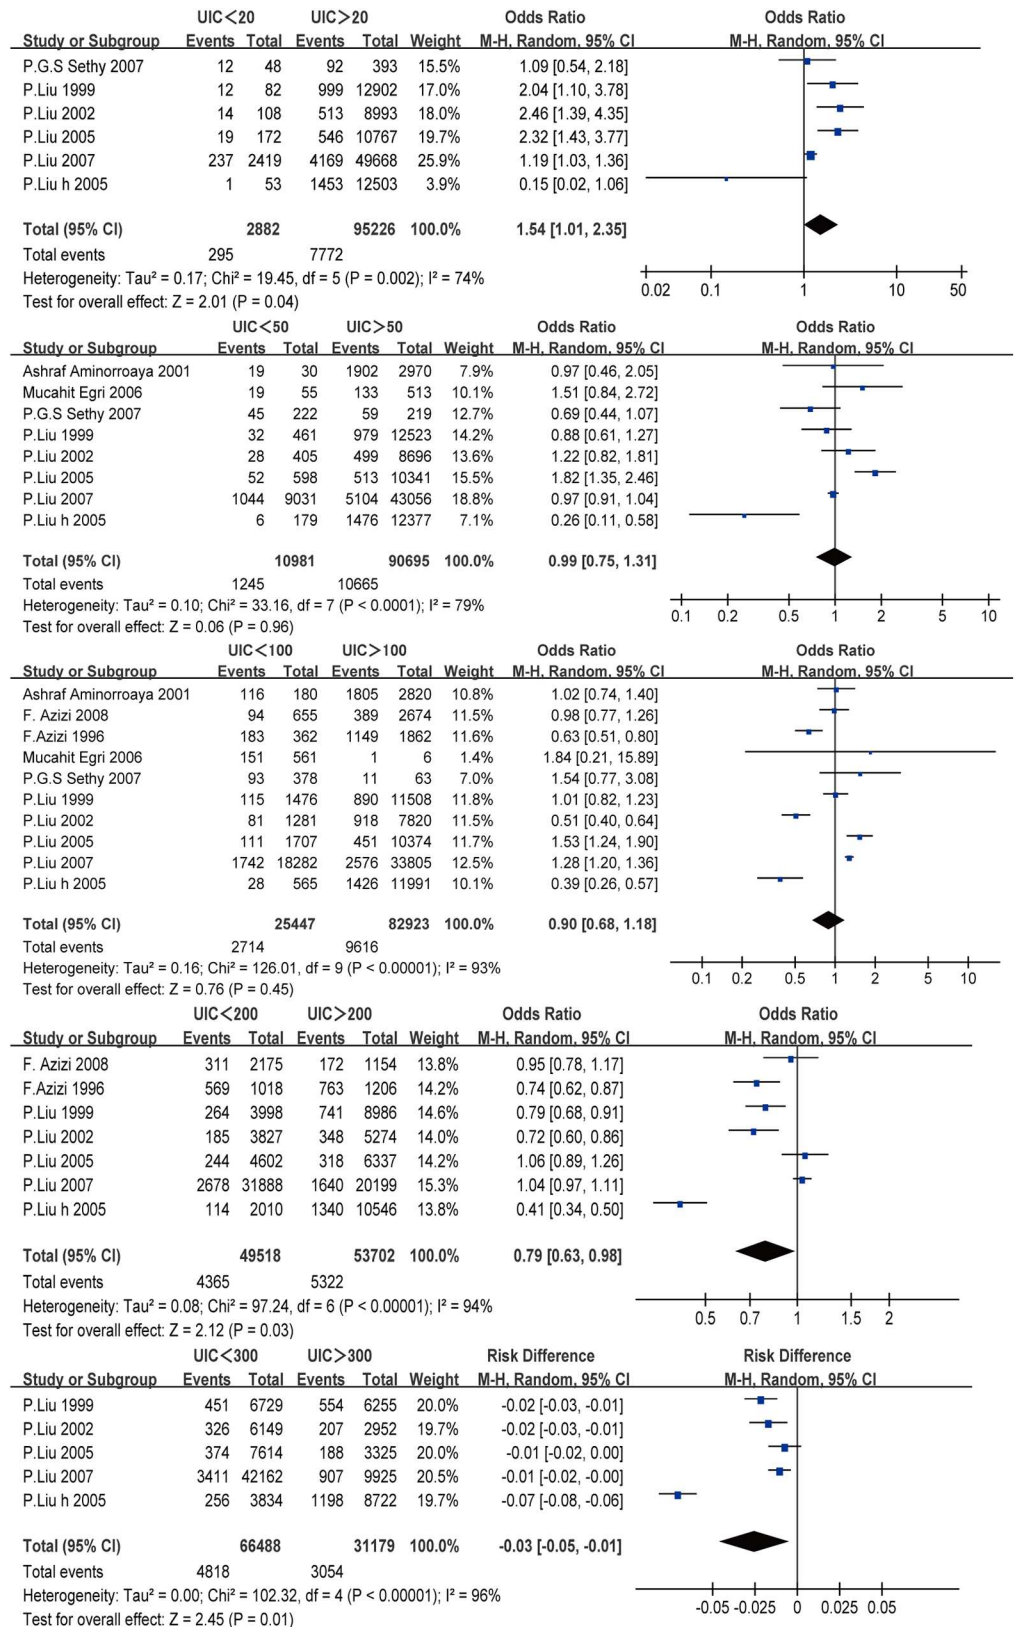

Fig 3. Forest plot showing the comparison of goiter prevalence in different UIC categories.

<https://doi.org/10.1371/journal.pone.0174095.g003>



95% CI: 0.63, 0.98;  $p = 0.04$ ), and  $<300 \mu\text{g/L}$  vs.  $>300 \mu\text{g/L}$  (OR:  $-0.03$ , 95% CI:  $-0.05$ ,  $-0.01$ ;  $p = 0.01$ ).

## Discussion

Iodine is an essential micronutrient that is required to synthesize thyroid hormones, and universal salt iodization is considered an appropriate method for iodine fortification in developed countries [27]. However, adverse effects have been recognized and careful monitoring is essential, as excessive iodine intake is associated with an increased risk of goiter and other iodine-related thyroid diseases. Thus, it is important to understand the association between iodine status and goiter prevalence after the implementation of the universal salt iodization. As UIC is highly sensitive to recent changes in iodine intake, UIC may be a reliable indicator for assessing, monitoring, and evaluating iodine status [28, 29]. For example, UIC might be a useful indicator of the effect of universal salt iodization and may help predict the occurrence of goiter.

We evaluated 11 case-control studies in the present meta-analysis, and found that children with goiter had significantly lower UIC values, compared to children without goiter, which indicates that lower UIC values were associated with an increased risk of goiter. Furthermore, as UIC is a reliable indicator for assessing population-level iodine status, it appears that iodine deficiency may lead to an increased risk of goiter. Similarly, an epidemical study has suggested that approximately 2.2 billion people live in areas with iodine deficiency and 30–70% of these people have goiter [30]. Although iodine deficiency is usually managed after the introduction of universal salt iodization, iodine excess has recently emerged as a noticeable public health issue. For example, several epidemiological studies have indicated that iodine excess is associated with iodine-induced hyperthyroidism and nodular goiters [22, 23, 31].

Based on the strong relationship between iodine status and goiter formation, it is important to evaluate the relationship between iodine status and goiter prevalence. Thus, we compared the prevalences of goiter among the different UIC groups based on the WHO classifications. This analysis revealed a U-shaped association between UIC and goiter prevalence, with higher prevalences observed at UIC values of  $<20 \mu\text{g/L}$  and  $>200 \mu\text{g/L}$ . Therefore, it appears that both severe iodine deficiency and excessive iodine intake may increase the risk of goiter, and this finding is consistent with the WHO recommended range for adequate iodine intake ( $100$ – $199 \mu\text{g/L}$ ).

Our meta-analysis has several strengths. First, most of the previous studies have focused on adults, rather than children. However, children are more sensitive to iodine deficiency or excess, and goiter or thyroid nodules are more frequently malignant during childhood, compared to during adulthood (26% vs. 5–10%, respectively) [32, 33]. Second, to the best of our knowledge, ours is the first study to evaluate the relationship between iodine status and goiter prevalence using a meta-analysis. The findings improve our understanding of how iodine status affects goiter prevalence, and suggest that UIC could be a promising biomarker for predicting goiter among school children, which could facilitate interventions to address iodine excess or deficiency. Third, our meta-analysis evaluated children from various races and locations, and the studies generally used long follow-ups, case-control designs, and large sample sizes. Thus, our results are unlikely to have been excessively influenced by the result from a single study.

Our meta-analysis also has several limitations. First, we did not have access to thyroid volume data, although thyroid gland inspection and palpation has been endorsed as part of the WHO criteria [1]. Thus, we were unable to evaluate the association between UIC and thyroid volume, which might have revealed the extent of the iodine status' influence on goiter

formation. Second, we did not have access to goiter classification data, and we were unable to evaluate the associations between iodine status and the different types of goiter. Third, we were unable to identify cases of autoimmune-related goiter, which might have distorted the association between UIC and goiter prevalence in our analyses. Fourth, although UIC reflects recent iodine status, it can also exhibit intra-day variations as a result of differences in iodine intake, which could have introduced information bias. Fifth, we were only able to evaluate reports in English and Chinese, and it is possible that reports in other languages or with negative results might not have been published and included in the databases that we searched. Thus, there is a possibility of both selection and publication bias.

## Supporting information

**S1 Table. The PRISMA check list.**

(DOC)

**S2 Table. The Newcastle-Ottawa Scale for assessing the methodological quality of the included studies.**

(XLS)

## Author Contributions

**Conceptualization:** GSZ LLX.

**Data curation:** LLX XMM.

**Formal analysis:** LLX.

**Funding acquisition:** GSZ.

**Investigation:** LLX XMM.

**Methodology:** LLX.

**Project administration:** GSZ.

**Resources:** LLX.

**Software:** LLX XMM.

**Supervision:** GSZ.

**Validation:** GSZ.

**Writing – original draft:** LLX.

**Writing – review & editing:** GSZ.

## References

1. World Health Organization, United Nations Children's Fund, and International Council for the Control of Iodine Deficiency Disorders. Assessment of iodine deficiency disorders and monitoring their elimination: A guide for program managers. 2007.
2. Delange F, Benoist B, Pretell E, Dunn JT. Iodine deficiency in the world: where do we stand at the turn of the century? *Thyroid*.2001; 11(5):437–47. <https://doi.org/10.1089/105072501300176390> PMID: 11396702
3. Vitti P, Delange F, Pinchera A, Zimmermann M, Dunn JT. Europe is iodine deficient. *Lancet*.2003; 361(9364):1226. [https://doi.org/10.1016/S0140-6736\(03\)12935-2](https://doi.org/10.1016/S0140-6736(03)12935-2) PMID: 12686067



4. Todd CH, Allain T, Gomo ZA, Hasler JA, Ndiweni M, Oken E. Increase in thyrotoxicosis associated with iodine supplements in Zimbabwe. *Lancet*. 1995; 346(8989):1563–4. PMID: [7491075](#)
5. Stanbury JB, Ermans AE, Bourdoux P, Todd C, Oken E, Tonglet R, et al. Iodine-induced hyperthyroidism: occurrence and epidemiology. *Thyroid*. 1998; 8(1):83–100. <https://doi.org/10.1089/thy.1998.8.83> PMID: [9492158](#)
6. Xiao DL, Sun DJ, Bai HQ, Liu SJ. China National Iodine Deficiency Disorders Surveillance 2005. Beijing: People's Medical Publishing House. 2007;43–46.
7. Venturi S, Venturi M. Iodine, thymus, and immunity. *Nutrition*. 2009; 5(9):977–979.
8. Hurrell RF. Bioavailability of iodine. *Eur J Clin Nutr*. 1997; 51:9–12.
9. Zimmermann MB, Jooste PL, Pandav CS. Iodine-deficiency disorders. *Lancet*. 2008; 372(9645):1251–1262. [https://doi.org/10.1016/S0140-6736\(08\)61005-3](https://doi.org/10.1016/S0140-6736(08)61005-3) PMID: [18676011](#)
10. Teng W, Shan Z, Teng X, Guan H, Li Y, Teng D, et al. Effect of iodine intake on thyroid diseases in China. *N Engl J Med*. 2006; 354(26):2783–93. <https://doi.org/10.1056/NEJMoa054022> PMID: [16807415](#)
11. König F, Andersson M, Hotz K, Aeberli I, Zimmermann MB. Ten repeat collections for urinary iodine from spot samples or 24-h samples are needed to reliably estimate individual iodine status in women. *J Nutr*. 2011; 141(11):2049–2054. <https://doi.org/10.3945/jn.111.144071> PMID: [21918061](#)
12. Goiter as a determinant of the prevalence and severity of iodine deficiency disorders in populations. WHO/NMH/NHD/EPG/14.5.
13. Moher D, Liberati A, Tetzlaff J, Altman DG. Preferred reporting items for systematic reviews and meta-analyses: the PRISMA statement. *Int J Surg*. 2010; 8(8):336–341.
14. Stroup DF, Berlin JA, Morton SC, Olkin I, Williamson GD, Rennie D, et al. Meta-analysis of observational studies in epidemiology: a proposal for reporting. Meta-analysis Of Observational Studies in Epidemiology (MOOSE) group. *JAMA*. 2000; 283(15): 2008–2012. PMID: [10789670](#)
15. GA Wells, B Shea, D O'Connell, J Peterson, V Welch, M Losos, et al. (2013) The Newcastle-Ottawa Scale (NOS) for assessing the quality of nonrandomised studies in meta-analyses. Available: [www.ohri.ca/programs/clinical\\_epidemiology/oxford.asp](http://www.ohri.ca/programs/clinical_epidemiology/oxford.asp).
16. Rezvanfar MR, Farahany H, Chehreyi A, Nemati M, Rostamy S, Karimy E. Urinary iodine excretion and antiperoxidase enzyme antibody in goitrous and healthy primary school children of Arak, Iran. *J. Endocrinol. Invest*. 2007; 30(4): 274–278. <https://doi.org/10.1007/BF03346293> PMID: [17556862](#)
17. Sethy PG, Bulliyya G, Mallick G, Swain BK, Kar SK. Iodine deficiency in urban slums of Bhubaneswar. *Indian Journal of Pediatrics*. 2007; 74(10):917–921. PMID: [17978450](#)
18. Cetin H, Kisioglu AN, Gursoy A, Bilaloglu E, Ayata A. Iodine deficiency and goiter prevalence in Turkey after mandatory iodization. *J. Endocrinol. Invest*. 2006; 29(8):714–718. <https://doi.org/10.1007/BF03344181> PMID: [17033260](#)
19. Cinaz P, Karakasu DS, Çamurdan MO, Bideci A, Ayvali ED, Yuçel C. Goiter Prevalence, Serum Selenium, and Urine Iodine Status in a Previously Iodine-Deficient Area in Turkey. *Biological Trace Element Research*. 2004; 100(3):185–193. PMID: [15475617](#)
20. Dodd NS, Samuel AM. Iodine deficiency in adolescents from Bombay slums. *The National Medical Journal of India*. 1993; 6(3):110–113. PMID: [8329988](#)
21. Özkan B, Olgun H, Ceviz N, Polat P, Taysi S, Orbak Z, Kosan C. Assessment of goiter prevalence, iodine status and thyroid functions in school-age children of rural Yusufeli district in eastern Turkey. *The Turkish Journal of Pediatrics*. 2004; 46(1): 16–21. PMID: [15074369](#)
22. Sanjari M, Gholamhoseinian A, Nakhaee A. The Association between Cobalt Deficiency and Endemic Goiter in School-Aged Children. *Endocrinol Metab*. 2014; 29:307–311.
23. Liu P, Liu SJ, Su XH, Zhang SB, Ji XH. Relationship between urinary iodine and goiter prevalence: Results of the Chinese national iodine deficiency disorders survey. *J. Endocrinol. Invest*. 2010; 33(1): 26–31. <https://doi.org/10.1007/BF03346545> PMID: [19494707](#)
24. Azizi F, Mehran L, Sheikholeslam R, Ordoorkhani A, Naghavi M, Hedayati M, et al. Sustainability of a well-monitored salt iodization program in Iran: Marked reduction in goiter prevalence and eventual normalization of urinary iodine concentrations without alteration in iodine content of salt. *J. Endocrinol. Invest*. 2008; 31(5): 422–431. <https://doi.org/10.1007/BF03346386> PMID: [18560260](#)
25. Aminorroaya A, Amini M, Rezvanian H, Kachoei A, Sadri G, Mirdamadi M, et al. Effects of iodized salt consumption on goiter prevalence in Isfahan: the possible role of goitrogens. *Endocr Pract*. 2001; 7(2):95–98. <https://doi.org/10.4158/EP.7.2.95> PMID: [11421552](#)
26. Egri M, Bayraktar N, Temel I, Ercan C, Mehtap Ilgar EP, Karaoglu L, et al. Prevalence of goiter and urinary iodine status of 7-11-year-old children in Malatya province, Turkey. *The Turkish journal of pediatrics*. 2006; 48(2):119–123. PMID: [16848110](#)

27. Clar C, Wu T, Liu G, Li P. Iodized salt for iodine deficiency disorders. A systematic review. *Endocrinol Metab Clin North Am.*2002; 31(3): 681–698. PMID: [12227127](#)
28. Van den Briel T, West CE, Hautvast J, Vulsmas T, de Vijlder JM, Ategbo EA. Serum thyroglobulin and urinary iodine concentration are the most appropriate indicators of iodine status and thyroid function under conditions of increasing iodine supply in schoolchildren in Benin. *J Nutr.*2001; 131(10):2701–2706. PMID: [11584093](#)
29. Delange F, Burgi H, Chen ZP, Dunn JT. World status of monitoring iodine deficiency disorders control programs. *Thyroid.* 2002; 12(10):915–924. <https://doi.org/10.1089/105072502761016557> PMID: [12494927](#)
30. Delshad H, Mehran L, Azizi F. Appropriate iodine nutrition in Iran: 20 years of success. *Acta Med Iran.*2010; 48(6): 361–366. PMID: [21287473](#)
31. Hans B. Iodine excess. *Best Pract. Res. Clin. Endocrinol. Metab.*2010; 24(1), 107–115. <https://doi.org/10.1016/j.beem.2009.08.010> PMID: [20172475](#)
32. Hegedus L. The Thyroid Nodule. *New England Journal of Medicine.* 2004; 351(17):1764–1771. <https://doi.org/10.1056/NEJMcp031436> PMID: [15496625](#)
33. Niedziela M. Pathogenesis, diagnosis and management of thyroid nodules in children. *Endocr Relat Cancer.*2006; 13: 427–453. <https://doi.org/10.1677/erc.1.00882> PMID: [16728572](#)
